# Supplementary material for: Microfluidic-Assisted Synthesis of Metal—Organic Framework —Alginate Micro-Particles for Sustained Drug Delivery
Source: MDPI journal article supplement (doi:10.3390/bios13070737), 2023-07-17
Supplement: s1 [file s1]

Supplementary Materials

# Microfluidic-Assisted Synthesis of Metal–Organic Framework—Alginate Micro-Particles for Sustained Drug Delivery

Akhilesh Bendre <sup>1</sup>, Vinayak Hegde <sup>1</sup>, Kanalli V. Ajeya <sup>2</sup>, Subrahmanya Thagare Manjunatha <sup>3</sup>, Derangula Somasekhara <sup>4</sup>, Varalakshmi K. Nadumane <sup>4</sup>, Krishna Kant <sup>5,\*</sup>, Ho-Young Jung <sup>2,\*</sup>, Wei-Song Hung <sup>3,\*</sup> and Mahaveer D. Kurkuri <sup>1,\*</sup>

<sup>1</sup> Centre for Research in Functional Materials (CRFM), JAIN (Deemed-to-be University), Jain Global Campus, Bengaluru 562112, Karnataka, India; akhilesh.bendre@jainuniversity.ac.in (A.B.); vinayakhegde2020@gmail.com (V.H.)

<sup>2</sup> Department of Environment and Energy Engineering, Chonnam National University, 77 Yongbong-ro, Buk-gu, Gwangju 61186, Republic of Korea; ajeyhegde94@gmail.com

<sup>3</sup> Advanced Membrane Materials Research Center, Graduate Institute of Applied Science and Technology, National Taiwan University of Science and Technology, Taipei 10607, Taiwan; mssubrahmanya@gmail.com

<sup>4</sup> Department of Biotechnology, JAIN (Deemed-to-be-University), School of Sciences, JC Road, 34, 1st Cross Road, Sudharna Nagar, Bengaluru 560027, Karnataka, India; d.somasekhara@jainuniversity.ac.in (D.S.); kn.varalakshmi@jainuniversity.ac.in (V.K.N.)

<sup>5</sup> Biomedical Research Center (CINBIO), University of Vigo, 36310 Vigo, Spain

\* Correspondence: krishna.kant@uvigo.es (K.K.); junghe@chonnam.ac.kr (H.-Y.J.); wshung@mail.ntust.edu.tw (W.-S.H.); mahaveer.kurkuri@jainuniversity.ac.in (M.D.K.)

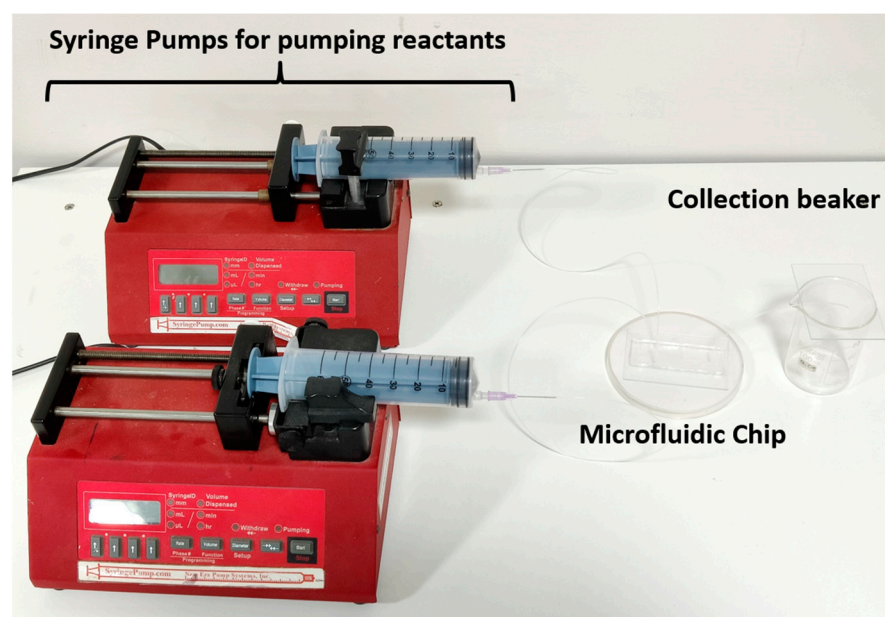

**Figure S1.** Setup for microfluidic MOF synthesis.

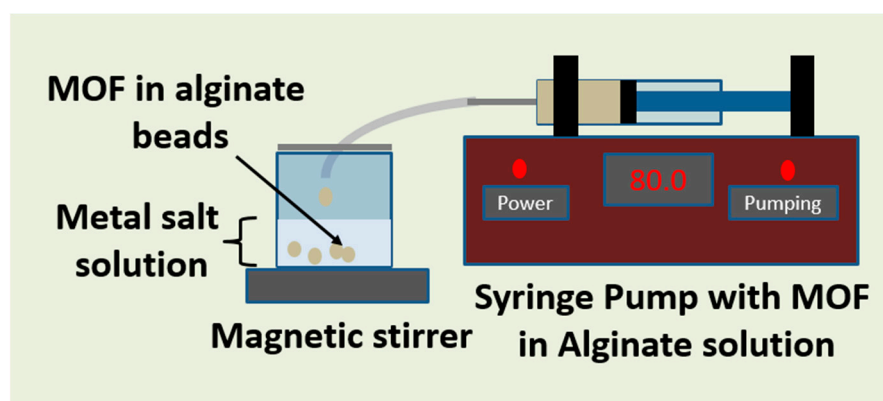

Figure S2. Schematic of setup for MOF in Alginate bead synthesis.

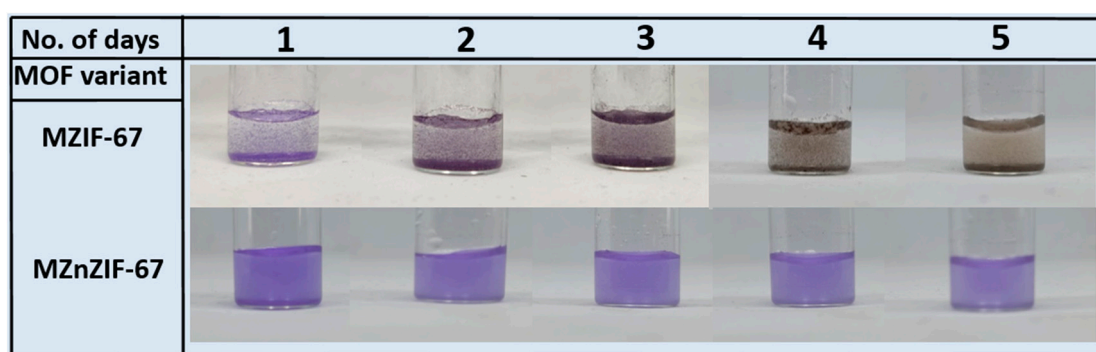

Figure S3. Stability of microfluidic synthesized MOF variants in PBS over a period of 5 days.

Table S1. BET isotherm parameters of different MOFs.

| Type of MOF/Adsorbent | $a_{s,BET}$<br>( $m^2g^{-1}$ ) | Mean pore diameter<br>(nm) | Total pore volume<br>( $cm^3g^{-1}$ ) |
|-----------------------|--------------------------------|----------------------------|---------------------------------------|
| ZIF-67                | 3001.3                         | 1.6177                     | 1.2138                                |
| MZIF-67               | 1823.4                         | 1.6057                     | 0.7319                                |
| MZnZIF-67             | 1864.3                         | 1.5674                     | 0.7305                                |

Table S2. The binding energies and elemental composition from the XPS of Alg\_MZnZIF-67

| Name  | Binding Energy (eV) | Atomic % |
|-------|---------------------|----------|
| C1s   | 284.6               | 48.58    |
| O1s   | 531.07              | 45.96    |
| Ca2p3 | 351.03              | 1.58     |
| Ca2p1 | 354.4               | 1.99     |
